# Supplementary material for: Impact of H3K27 trimethylation loss in meningiomas: a meta-analysis
Source: PubMed Central journal article supplement (PMC10369842; doi:10.1186/s40478-023-01615-9), 2023-07-25

**A**

|                   | D1 | D2 | D3 | D4 | D5 | D6 | D7 | D8 | D9 | D10 | D11 | D12 | D13 | D14 |
|-------------------|----|----|----|----|----|----|----|----|----|-----|-----|-----|-----|-----|
| Ammendola et al.  | +  | +  | +  | +  | ×  | +  | ×  | ○  | +  | ○   | +   | ×   | ○   | ×   |
| Behling et al.    | +  | +  | +  | +  | ×  | +  | -  | ○  | +  | ○   | +   | ×   | ○   | +   |
| Gauchotte et al.  | +  | +  | +  | +  | ×  | +  | -  | ○  | +  | ○   | +   | ×   | ○   | ×   |
| Hua et al. (2020) | +  | +  | +  | +  | ×  | +  | -  | ○  | +  | ○   | +   | ×   | ○   | -   |
| Hua et al. (2023) | +  | +  | +  | +  | ×  | +  | -  | ○  | +  | ○   | +   | ×   | ○   | -   |
| Jung et al.       | +  | +  | ×  | ×  | ×  | +  | -  | ○  | +  | ○   | +   | ×   | ○   | -   |
| Katz et al.       | +  | +  | +  | +  | ×  | +  | -  | ○  | +  | ○   | +   | ×   | ○   | +   |
| Nassiri et al.    | +  | +  | +  | +  | ×  | +  | -  | ○  | +  | ○   | +   | ×   | ○   | +   |
| Samal et al.      | +  | +  | +  | +  | ×  | +  | ×  | ○  | +  | ○   | +   | ×   | ○   | -   |

D1: Research question or objective stated.  
 D2: Study population defined.  
 D3: Study population participation rate >50%.  
 D4: Subject recruitment and eligibility criteria.  
 D5: Sample size justification.  
 D6: Exposure assessed prior to outcome measurement.

D7: Sufficient timeframe to see effect.  
 D8: Varying exposure levels used.  
 D9: Exposure measures clearly defined and implemented.  
 D10: Exposure assessed more than one time.  
 D11: Outcome measures clearly defined and implemented.  
 D12: Outcome assessors blinded to exposure.

D13: Loss to follow-up <20%.  
 D14: Key potential confounders measured and adjusted.

+ Yes  
 - Unclear  
 × No  
 ○ Not Applicable

**B****Funnel Plot: Prevalence Estimate of H3K27me3 Loss**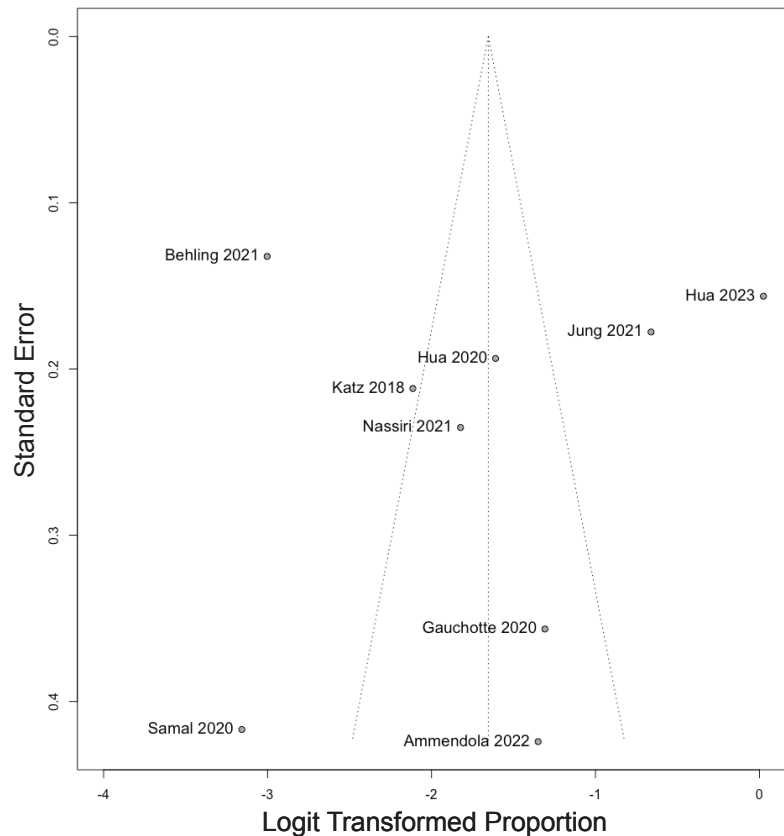**C****Funnel Plot: Recurrence Hazard Ratio after H3K27me3 Loss**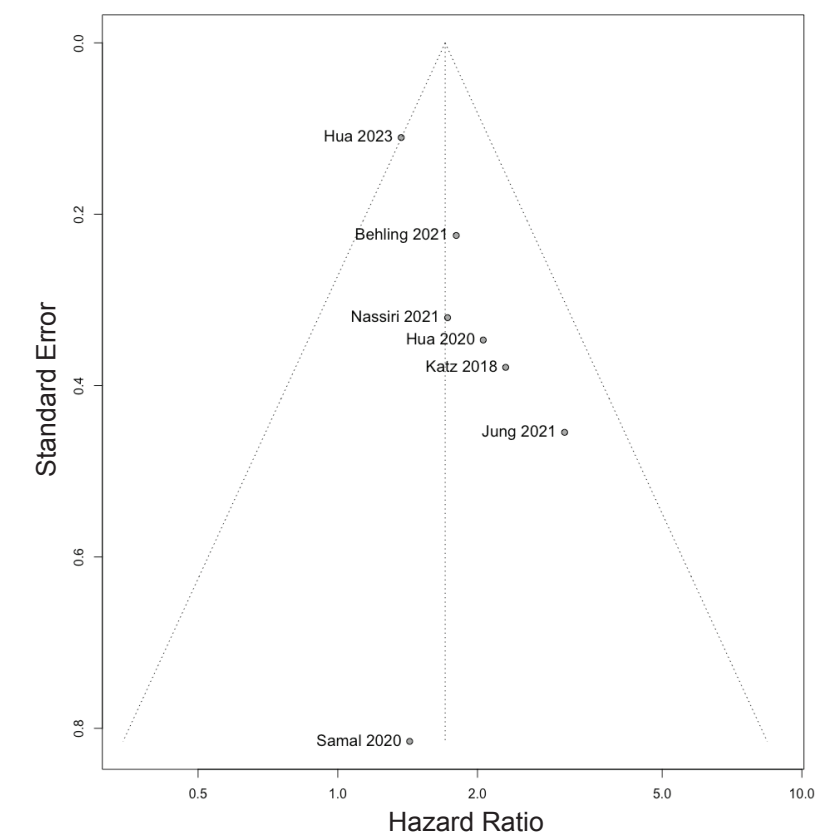

Supplement: 40478_2023_1615_MOESM2_ESM.pdf [file 40478_2023_1615_MOESM2_ESM.pdf]
